# Supplementary material for: Enhanced antagonism of BST-2 by a neurovirulent SIV envelope
Source: JCI journal article supplement (doi:10.1172/jci83725), 2016-05-08
Supplement: sd1 [file 1]

**Primers**

|                   |                                    |
|-------------------|------------------------------------|
| <b>gag-R</b>      | TGA CGC AGA CAG TAT TAT AAA GGC TC |
| <b>R-R</b>        | TGC TTA CTT CTA AAT GGC AGC TTT    |
| <b>R-F</b>        | CAGTCG CTC TGC GGA GAG GCT GG      |
| <b>Bgl-F</b>      | GGC AGC AGA TCT TGG CCT TGG C      |
| <b>nefend-R</b>   | GCC TCT TGC GGT TAG CCT TC         |
| <b>env10651-F</b> | GAT GTG CTT TTA GGC AAG            |
| <b>nefstart-R</b> | TAT ATT TCT GAG GCT CAC AAG AGA G  |
| <b>Hind-R</b>     | GAC CAT GAT TAC GCC AAG CTT        |
| <b>nefend-F</b>   | GAA GGC TAA CCG CAA GAG GC         |
| <b>nefstart-F</b> | CTC TCT TGT GAG CCT CAG AAA TAT A  |
| <b>9341-R</b>     | CAT CAT CCA CAT CAT CCA TG         |
| <b>6463-F</b>     | GGT GTT GCT ATC ATT GTC AGC        |

**Supplemental Table 1:** Primers used for construction of chimeric SIV and obtaining cDNA from viral stocks for sequencing.

| Clones          |                     | Forward Primer                     | Reverse Primer                     |
|-----------------|---------------------|------------------------------------|------------------------------------|
| SIVsm543CT #1   |                     | GGA TCT ACC AGA CCC TCC AAC CAG TG | CAC TGG TTG GAG GGT CTG GTA GAT CC |
| SIVsm543CT #2   |                     | CAG AAT TGA AAG AAC CTA CCT AC     | GTA GGT AGG TTC TTT CAA TTC TG     |
| SIVsm543CT #3   |                     | CAG AAT TGA AAT AGC CTA CCT AC     | GTA GGT AGG CTA TTT CAA TTC TG     |
| SIVsm543CT #4   |                     | CCC TAG GCG CAT CAG GCA AGG GC     | GCC CTT GCC TGA TGC GCC TAG GG     |
| SIVsm543CT #154 | 1 <sup>st</sup> PCR | CAG AAT TGA AAG AGC CTA CCT AC     | GTA GGT AGG CTC TTT CAA TTC TG     |
|                 | 2 <sup>nd</sup> PCR | GGA TCT ACC AGA CCC TCC AAC CAG TG | CAC TGG TTG GAG GGT CTG GTA GAT CC |
|                 | 3 <sup>rd</sup> PCR | CCC TAG GCG CAT CAG GCA AGG GC     | GCC CTT GCC TGA TGC GCC TAG GG     |

**Supplemental Table 2:** Primers used for introducing point mutations to gp41 cytoplasmic tail of SIVsmE543.

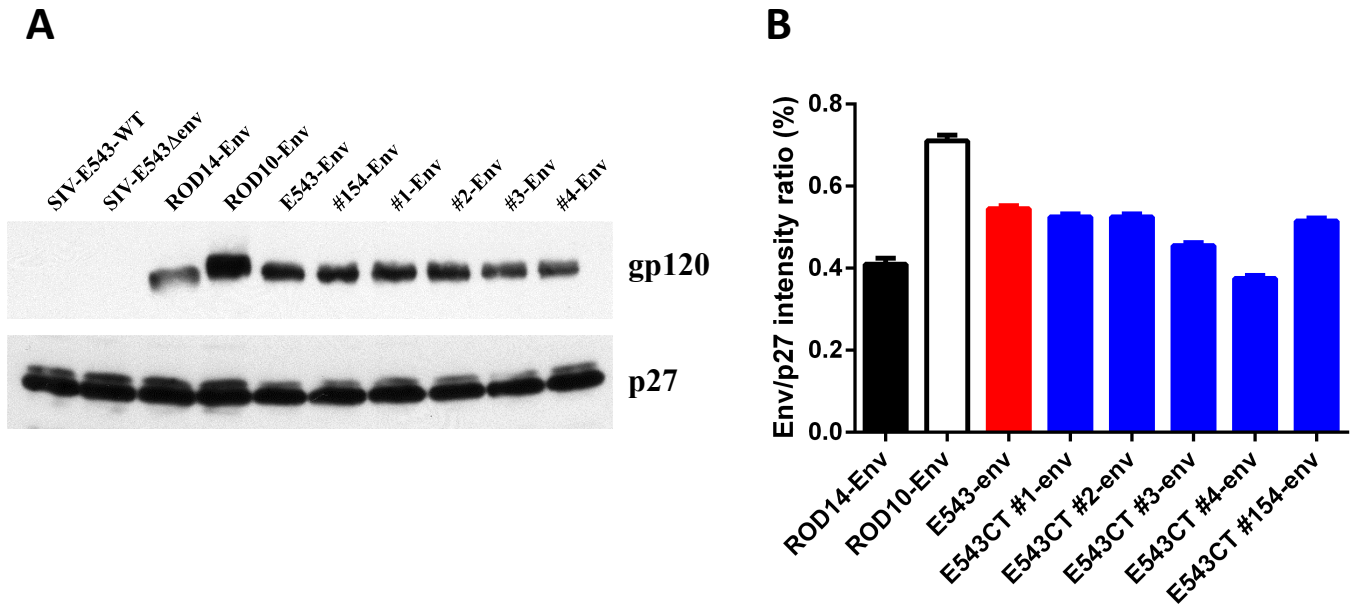

**Supplemental Figure 1: Assessment of Virion incorporation of Envelope.** (A) 293T cells were transfected with 4  $\mu$ g of pSIV-E543 WT or pSIV-E543 $\Delta$ env DNA in the presence or absence of pHA-smE543-Env (SIVsmE543-3), pHA-E543#1 (SIVsmE543CT #1), pHA-E543#2 (SIVsmE543CT #2), pHA-E543#3 (SIVsmE543CT #3), pHA-E543#4 (SIVsmE543CT #4) and pHA-E543#154 (SIVsmE543CT #154) as indicated. Supernatants were collected 24 hour after transfection. A fraction of the cell-free virus (80%) was pelleted through a 20% sucrose cushion and suspended in sample buffer for immunoblot analysis (virus). Samples were separated by SDS-PAGE and analyzed with antibodies to HA (Envelope) or SIV Ig-p27 (Gag: Advanced Bioscience Laboratories, Rockville, MD (cat# 4323)) as indicated. A representative of two independent experiments is shown. (B) Relative amounts of Envelope and Gag (p27) ratio were calculated. Data represent means  $\pm$  SEM from two independent analyses.

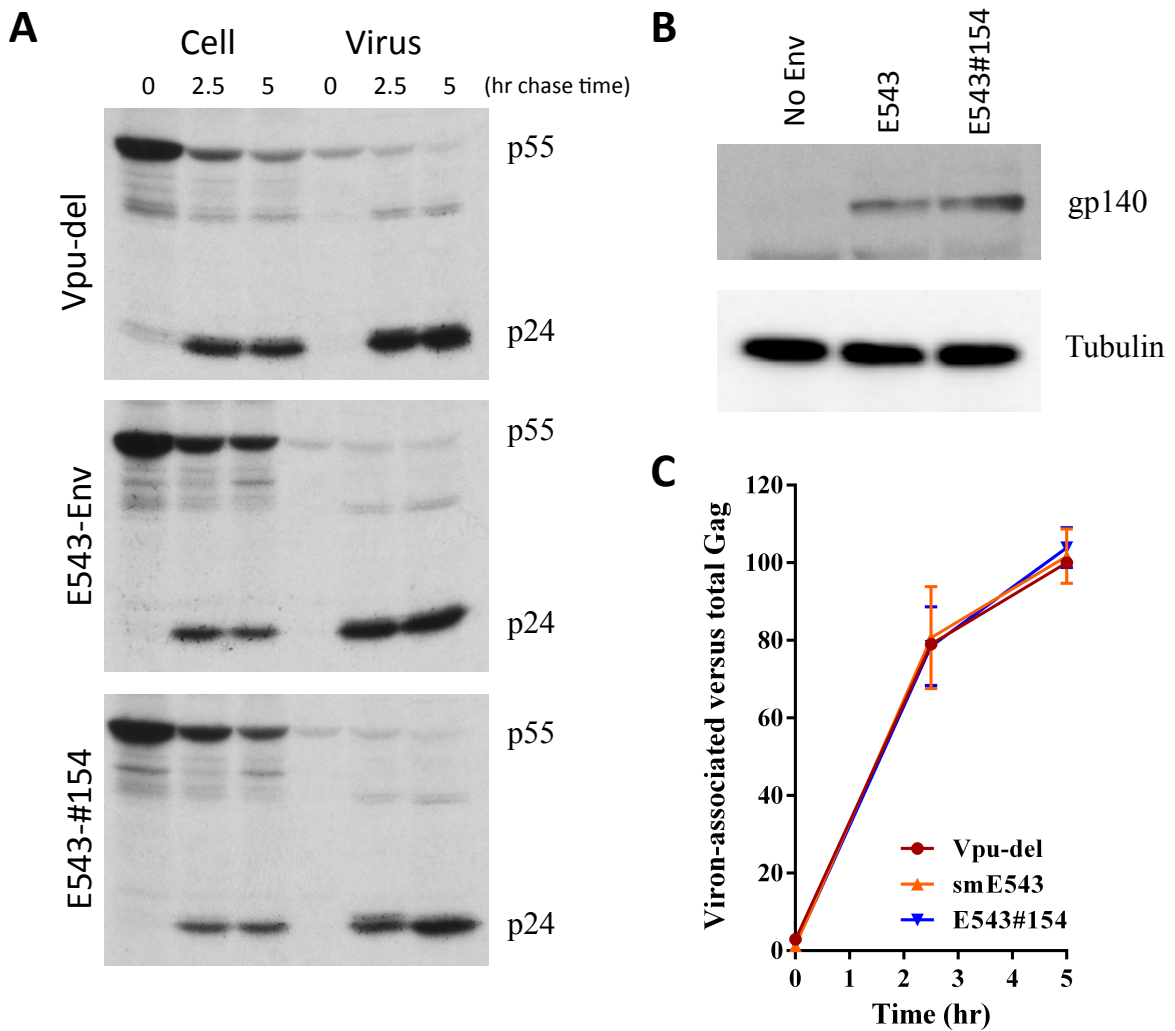

**Supplemental Figure 2: HIV-1 particle release in the absence of BST-2.** (A) Kinetic analysis of viral particle release by the Vpu-deficient pNL4-3/Udel-1 in the presence of HIV-2 Env or SIVsm Env. 293T cells were transfected with pNL4-3/Udel-1 together with vectors for the expression of HA-tagged Envs from SIVsmE543 wt or mutant SIVsmE543#154. Samples were subjected to pulse-chase analysis and viral proteins recovered by immunoprecipitation were separated by SDS-PAGE. The HIV-1 major Gag proteins p55<sub>gag</sub> and p24<sub>CA</sub> are identified on the right. (B) Protein expression for Env was verified by western blot analysis using cellular  $\alpha$ -tubulin as a loading control. (C) Bands corresponding to the precursor and mature Gag proteins in panel A were quantified and the efficiency of particle release at each time point was calculated and plotted as a function of time. Maximal release of Vpu-del virus at 5 hr chase was defined as 100%. All other data points were normalized accordingly. No statistical significances of differences between particle release kinetics in the presence of SIVsmE543 or mutant SIVsmE543#154 Env proteins were observed compared to the cells transfected with only pNL4-3/Udel-1 vector, as assessed by the repeated measures two-way ANOVA ( $F(2, 3) = 0.004609$ ,  $P = 0.9954$ ).
